# Supplementary material for: A reference library for Canadian invertebrates with 1.5 million barcodes, voucher specimens, and DNA samples
Source: Springer Nature journal article supplement (doi:10.1038/s41597-019-0320-2), 2019-12-06

## Supplementary Information

Supplementary files to accompany deWaard et al. – ‘A reference library for Canadian invertebrates with 1.5 million barcodes, voucher specimens, and DNA samples’.

|                                                                                                                                                          |    |
|----------------------------------------------------------------------------------------------------------------------------------------------------------|----|
| Supplementary File 1. Duration of sampling from 2012-2014 as visualized by the number of Julian days of collecting for the ‘National Parks’ subset. .... | 2  |
| Supplementary File 2. Breakdown of the methods used in the five major collection programs. ....                                                          | 3  |
| Supplementary File 3. Taxonomic assignment workflow. ....                                                                                                | 4  |
| Supplementary File 4. Example BOLD Neighbor-Joining tree for Canadian net-winged insects (Neuroptera). ....                                              | 5  |
| Supplementary File 5. Example BOLD image library (associated with Supplementary File 4) for Canadian net-winged insects (Neuroptera). ....               | 6  |
| Supplementary File 6. Taxonomic breakdown for the eight major collection methods used in the ‘National Parks’ subset. ....                               | 11 |

**Supplementary File 1.** Duration of sampling from 2012-2014 as visualized by the number of Julian days of collecting for the 'National Parks' subset.

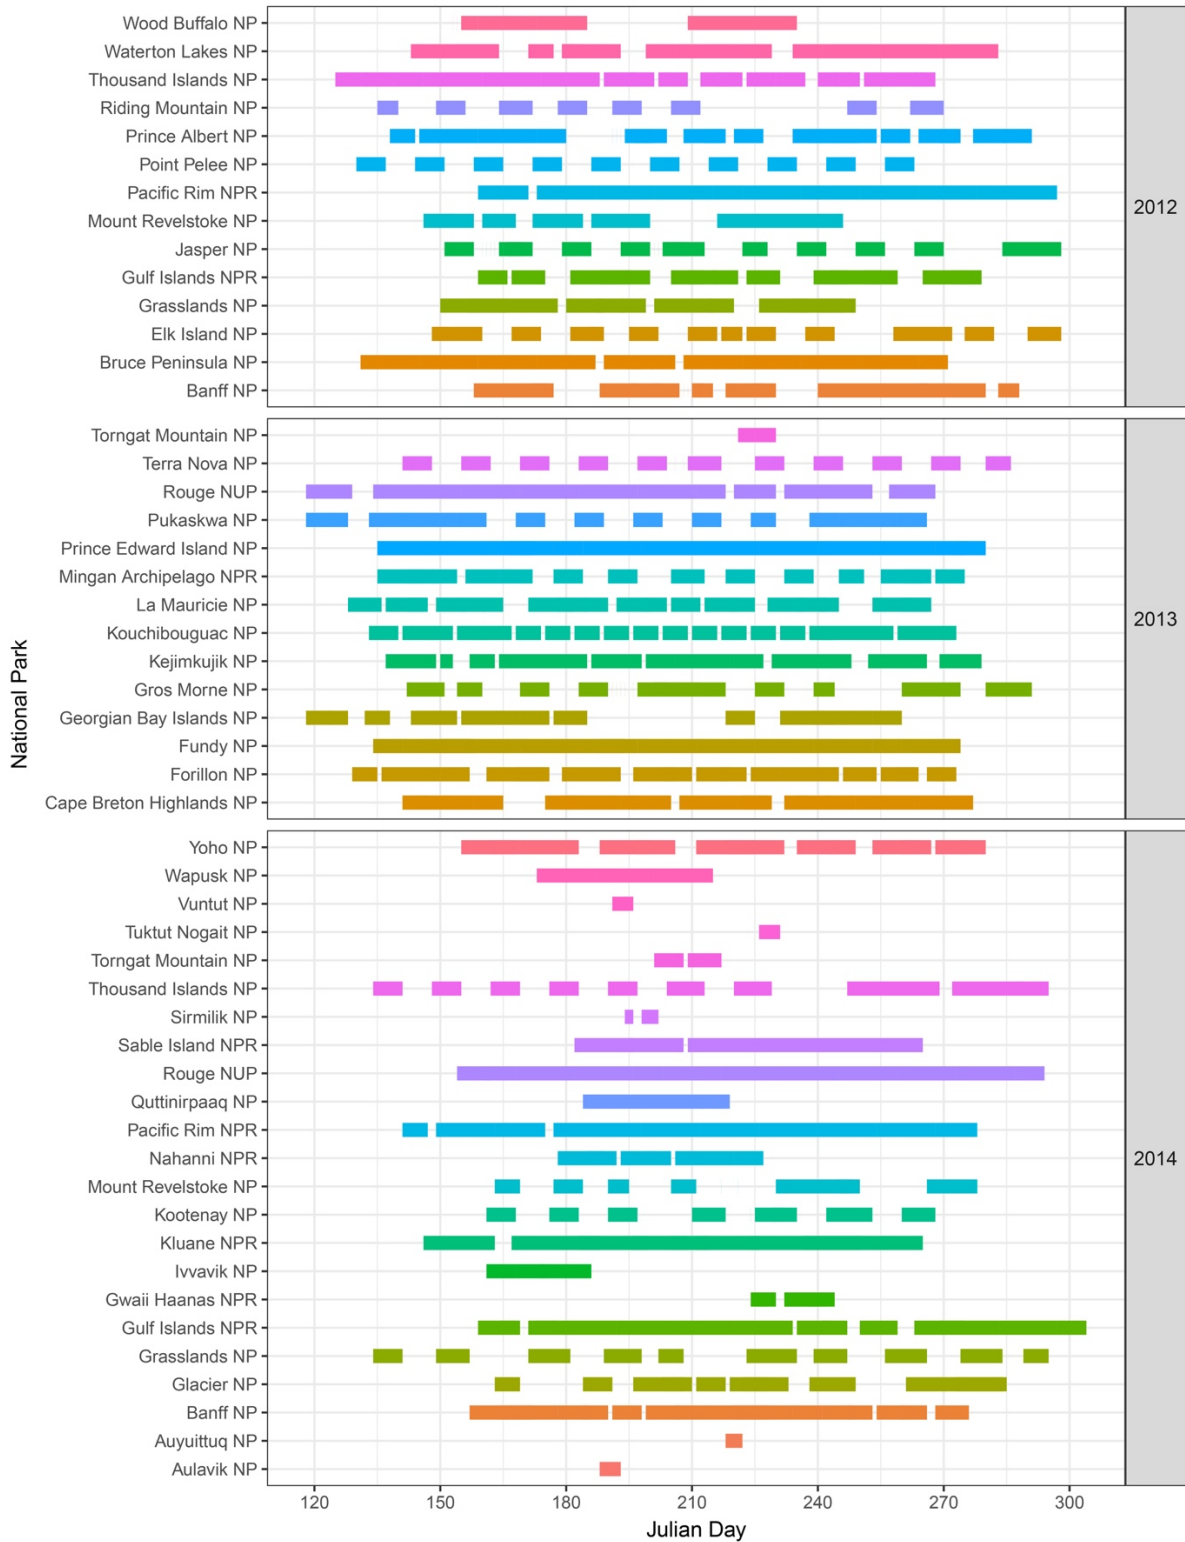

**Supplementary File 2.** Breakdown of the methods used in the five major collection programs.

|                    | A. 'National Parks' subset      |                               |                   | B. 'Other Localities' subset    |                             |                                                  |                   |
|--------------------|---------------------------------|-------------------------------|-------------------|---------------------------------|-----------------------------|--------------------------------------------------|-------------------|
|                    | Global Malaise Program - Canada | Standardized Sampling Program | Other Collections | Global Malaise Program - Canada | School Malaise Trap Program | All taxa biodiversity inventories and bioblitzes | Other Collections |
| Malaise Trap       | x                               | x                             | x                 | x                               | x                           | x                                                | x                 |
| Intercept Trap     |                                 | x                             | x                 |                                 |                             | x                                                | x                 |
| Pan Trap           |                                 | x                             | x                 |                                 |                             | x                                                | x                 |
| UV Light Trap      |                                 |                               | x                 |                                 |                             | x                                                | x                 |
| UV Light Sheet     |                                 |                               | x                 |                                 |                             | x                                                | x                 |
| Pitfall trap       |                                 | x                             | x                 |                                 |                             | x                                                | x                 |
| Sweep Net          |                                 | x                             | x                 |                                 |                             | x                                                | x                 |
| Free Hand          |                                 |                               | x                 |                                 |                             | x                                                | x                 |
| Berlese Funnel     |                                 |                               | x                 |                                 |                             | x                                                | x                 |
| UV Bucket Trap     |                                 |                               | x                 |                                 |                             | x                                                |                   |
| Dip net            |                                 |                               | x                 |                                 |                             | x                                                | x                 |
| Bottle Trap        |                                 |                               | x                 |                                 |                             | x                                                | x                 |
| Mustard Extraction |                                 |                               | x                 |                                 |                             |                                                  | x                 |
| Sieve              |                                 |                               | x                 |                                 |                             |                                                  | x                 |
| Plankton Net       |                                 |                               | x                 |                                 |                             | x                                                | x                 |

**Supplementary File 3. Taxonomic assignment workflow.**

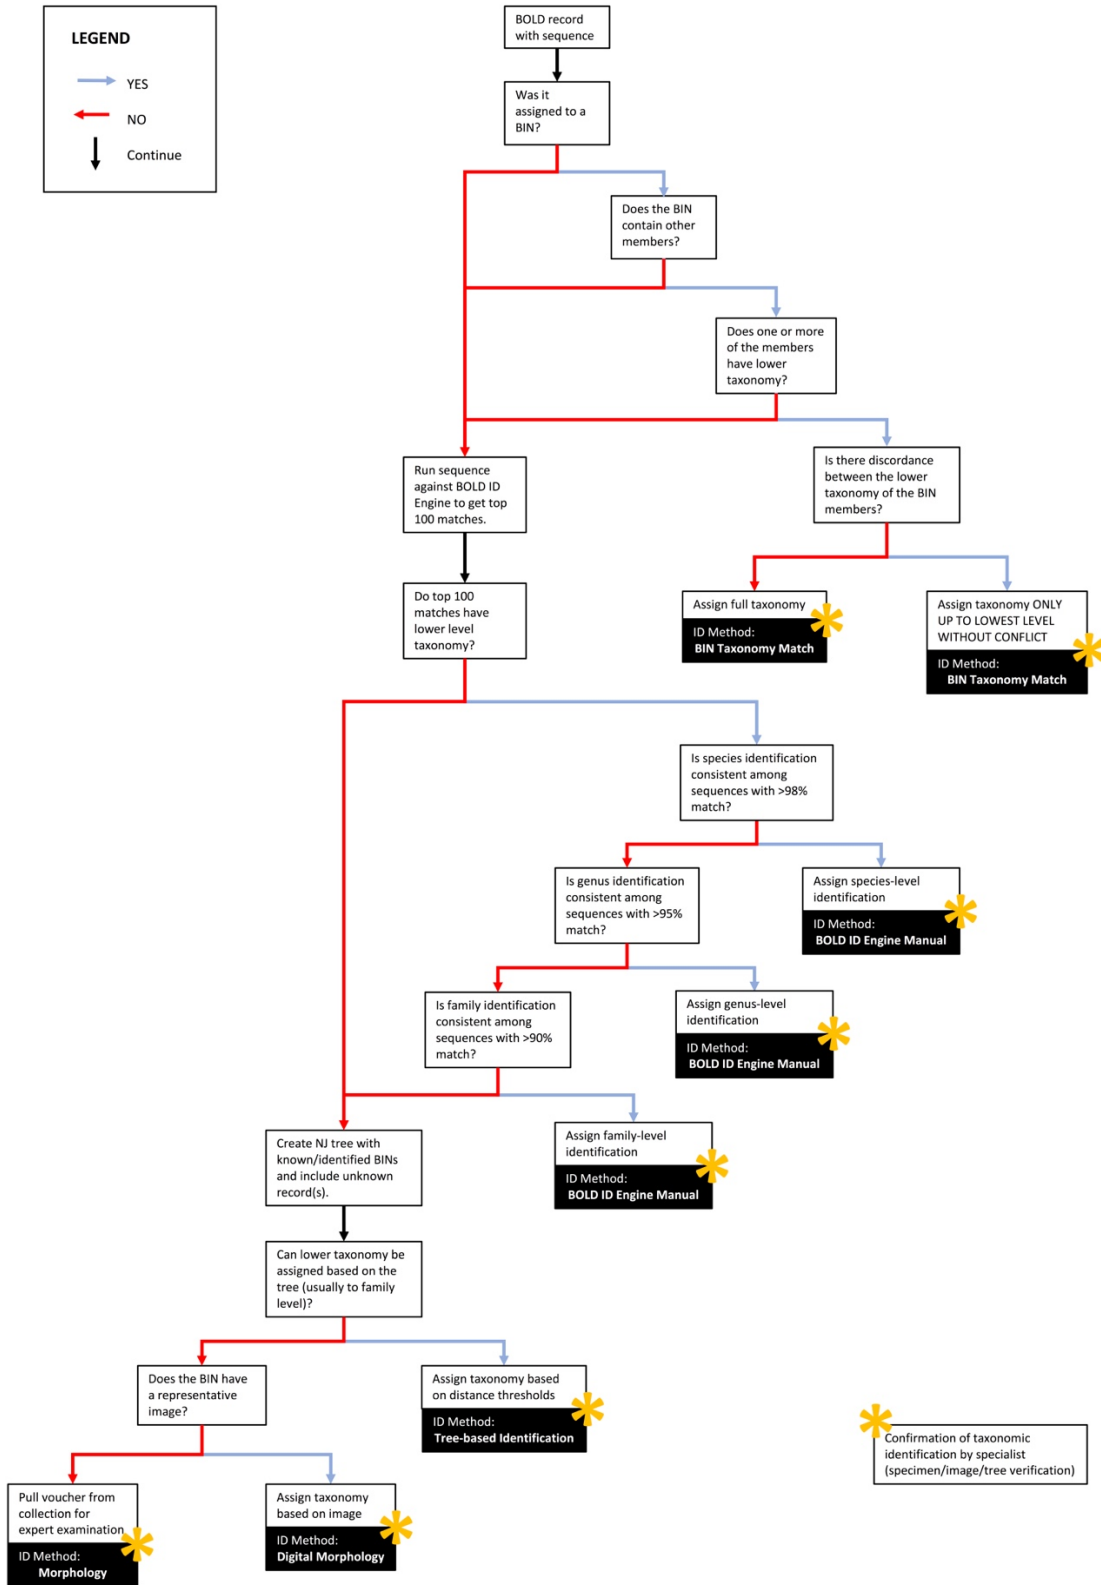

**Supplementary File 4. Example BOLD Neighbor-Joining tree for Canadian net-winged insects (Neuroptera).**

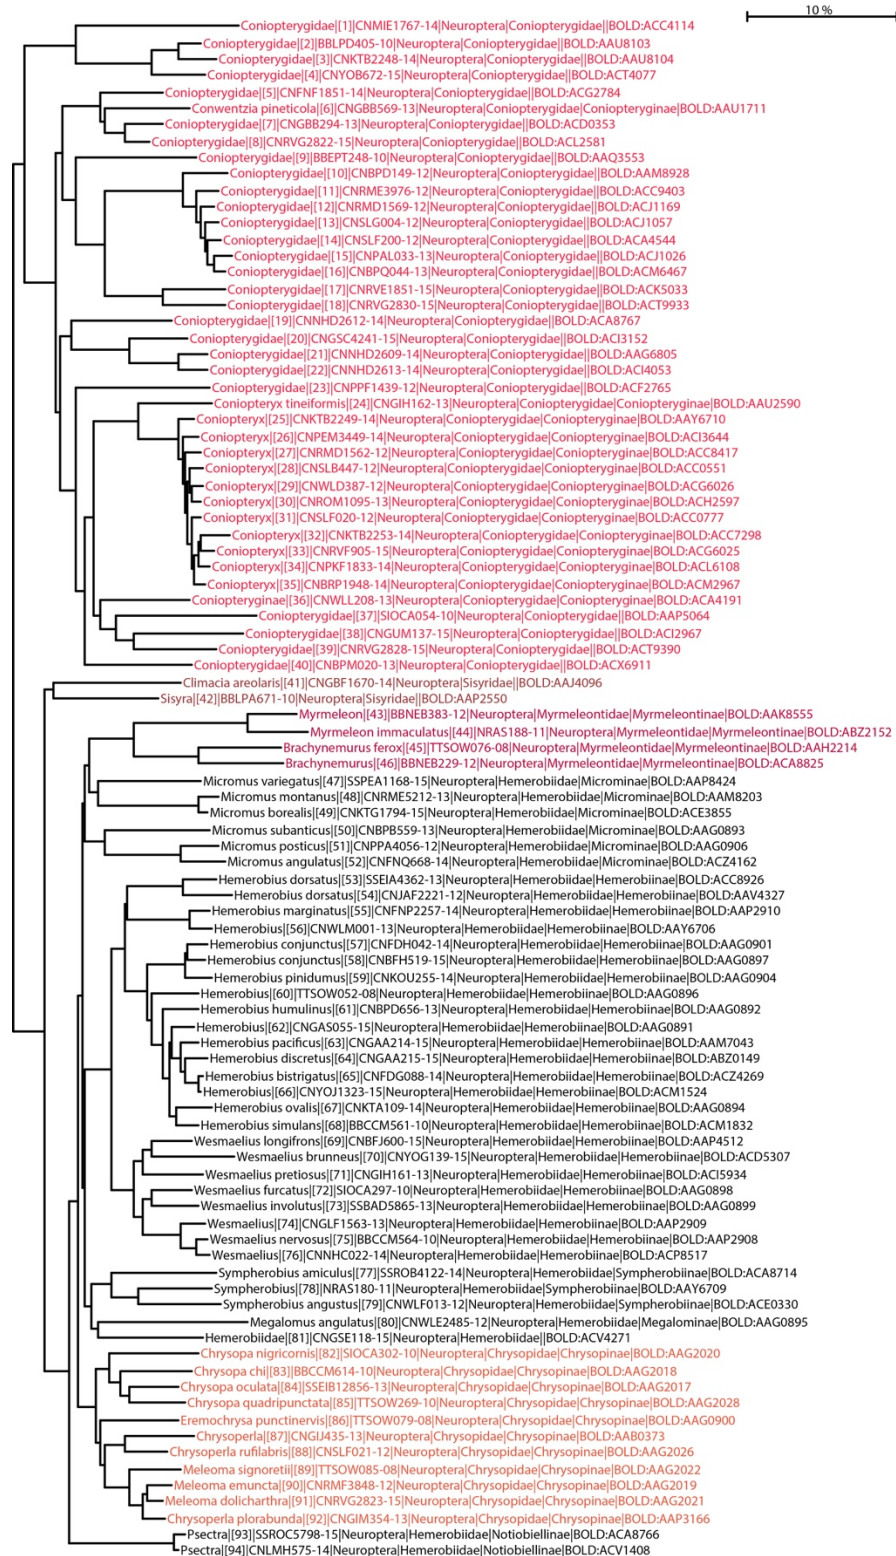

**Supplementary File 5.** Example BOLD image library (associated with Supplementary File 3) for Canadian net-winged insects (Neuroptera).

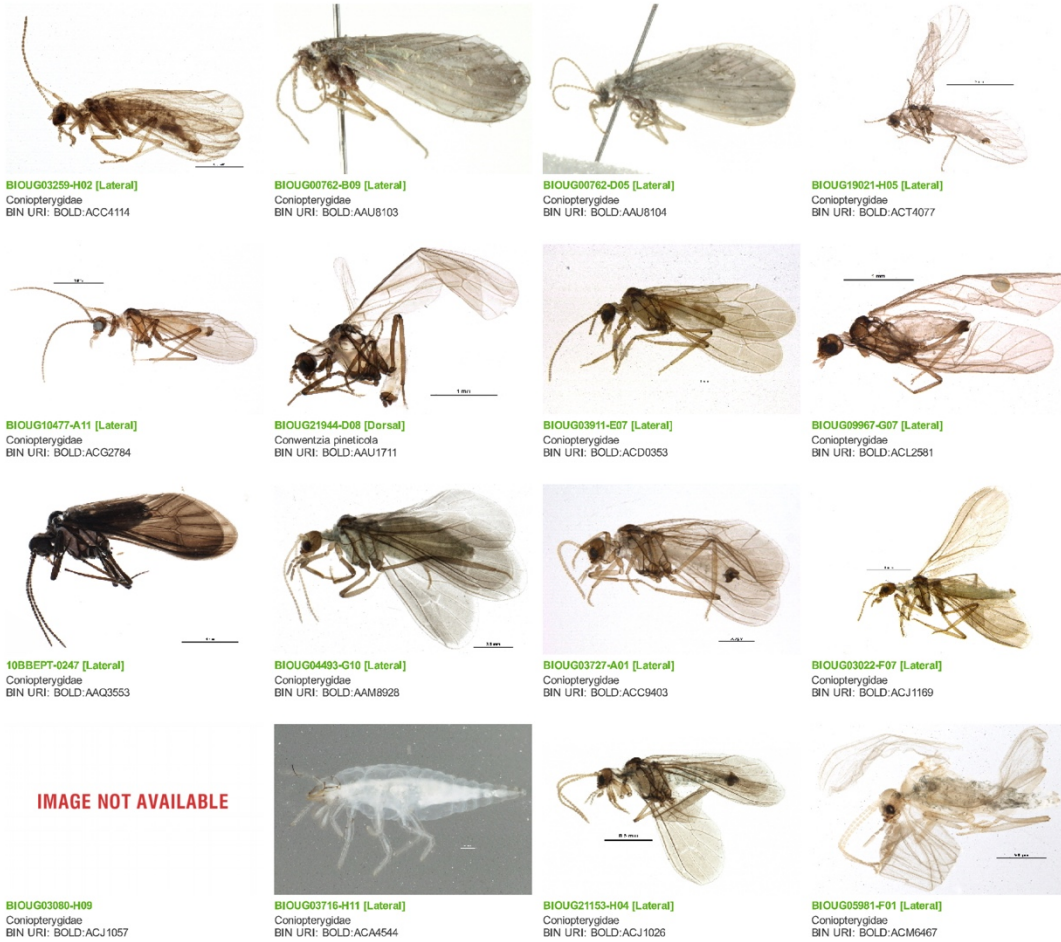

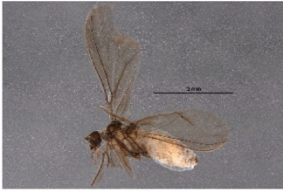

**BIOUG07110-C06 [Lateral]**  
Coniopterygidae  
BIN URI: BOLD:ACK5033

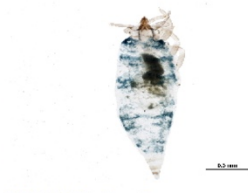

**BIOUG20369-F05 [Dorsal]**  
Coniopterygidae  
BIN URI: BOLD:ACT9933

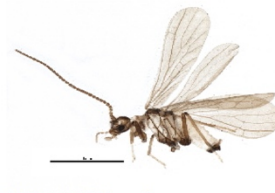

**BIOUG17693-G11 [Lateral]**  
Coniopterygidae  
BIN URI: BOLD:ACA8767

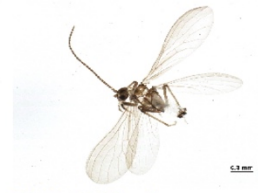

**BIOUG07171-B08 [Lateral]**  
Coniopterygidae  
BIN URI: BOLD:ACI3152

[skewed]

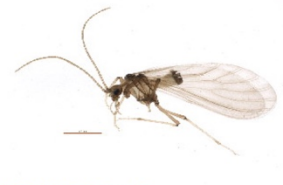

**BIOUG03280-F10 [Lateral]**  
Coniopterygidae  
BIN URI: BOLD:AAG6805

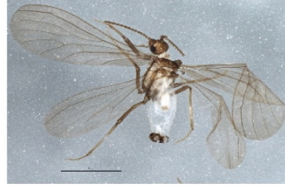

**BIOUG06018-H10 [Dorsal]**  
Coniopterygidae  
BIN URI: BOLD:ACI4053

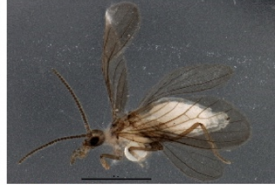

**BIOUG03566-A09 [Lateral]**  
Coniopterygidae  
BIN URI: BOLD:ACF2765

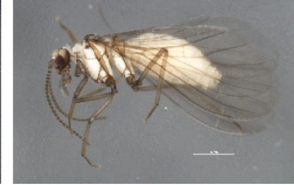

**BIOUG00864-E03 [Lateral]**  
Coniopteryx tineiformis  
BIN URI: BOLD:AAU2590

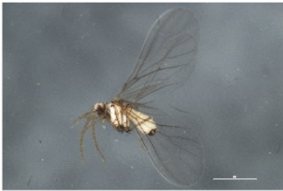

**BIOUG00864-E04 [Lateral]**  
Coniopteryx  
BIN URI: BOLD:AAV6710

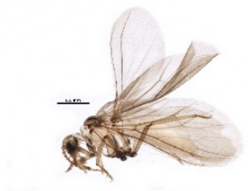

**BIOUG11087-G10 [Lateral]**  
Coniopteryx  
BIN URI: BOLD:ACI3644

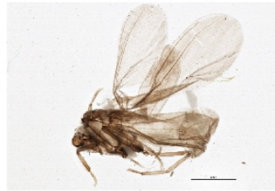

**BIOUG03022-E12 [Lateral]**  
Coniopteryx  
BIN URI: BOLD:ACC8417

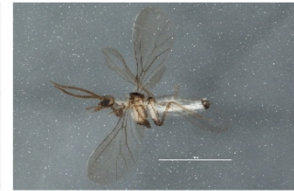

**BIOUG02751-B10 [Lateral]**  
Coniopteryx  
BIN URI: BOLD:ACC0951

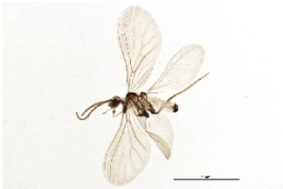

**BIOUG03259-G04 [Lateral]**  
Coniopteryx  
BIN URI: BOLD:ACG6026

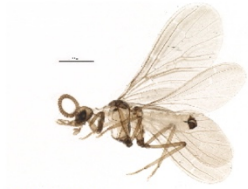

**BIOUG06869-F09 [Lateral]**  
Coniopteryx  
BIN URI: BOLD:ACH2597

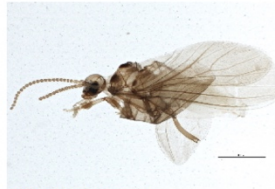

**BIOUG04967-C05 [Lateral]**  
Coniopteryx  
BIN URI: BOLD:ACC0777

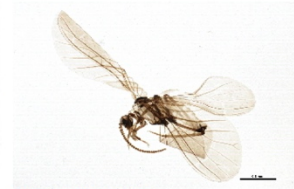

**BIOUG03259-G06 [Lateral]**  
Coniopteryx  
BIN URI: BOLD:ACC7298

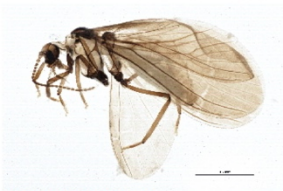

**BIOUG03259-G07 [Lateral]**  
Coniopteryx  
BIN URI: BOLD:ACG6025

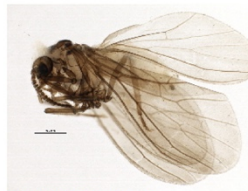

**BIOUG10296-F02 [Lateral]**  
Coniopteryx  
BIN URI: BOLD:ACL6108

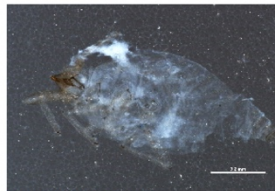

**BIOUG11215-B08 [Lateral]**  
Coniopteryx  
BIN URI: BOLD:ACM2967

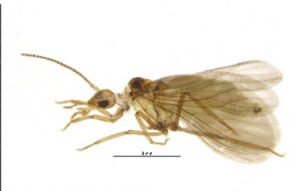

**BIOUG03566-B01 [Lateral]**  
Coniopterygidae  
BIN URI: BOLD:ACA4191

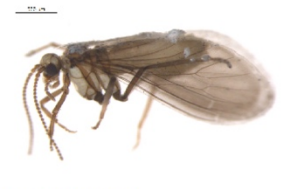

**10BBSIQ-0054 [Lateral]**  
Coniopterygidae  
BIN URI: BOLD:AAP5064

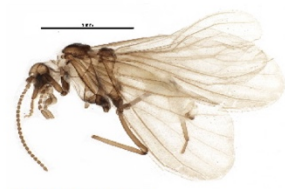

**BIOUG06845-F06 [Lateral]**  
Coniopterygidae  
BIN URI: BOLD:ACI2967

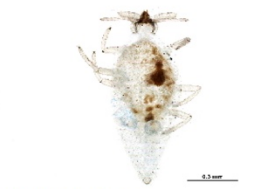

**BIOUG20369-F03 [Dorsal]**  
Coniopterygidae  
BIN URI: BOLD:ACT9390

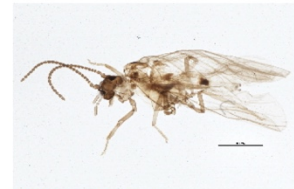

**BIOUG05828-E10 [Lateral]**  
Coniopterygidae  
BIN URI: BOLD:ACX6911

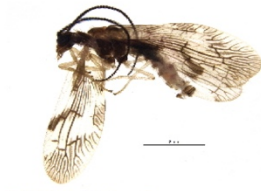

**BIOUG10061-H03 [Lateral]**  
*Climacia areolaris*  
BIN URI: BOLD:AAJ4096

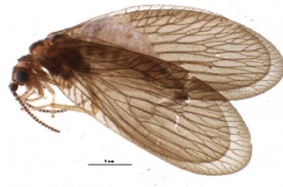

**BIOUG08286-F11 [Lateral]**  
*Sisyra*  
BIN URI: BOLD:AAP2550

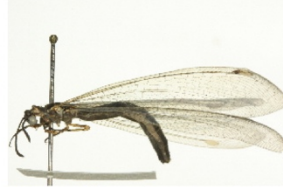

**BIOUG02806-F02 [Lateral]**  
*Myrmeleon*  
BIN URI: BOLD:AAK8555

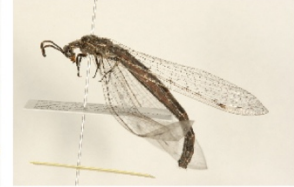

**09BBNEU-0055 [Lateral]**  
*Myrmeleon immaculatus*  
BIN URI: BOLD:ABZ2152

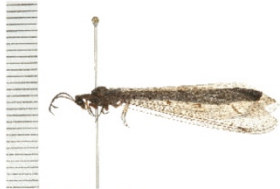

**08BBNEU-076 [Lateral]**  
*Brachynemurus ferox*  
BIN URI: BOLD:AAH2214

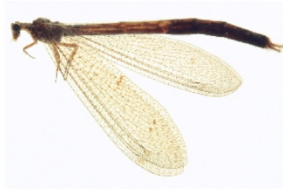

**BIOUG02805-A01 [Lateral]**  
*Brachynemurus*  
BIN URI: BOLD:ACA8825

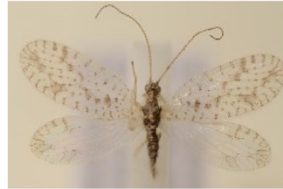

**TR00040 [Dorsal]**  
*Micromus variegatus*  
BIN URI: BOLD:AAP8424

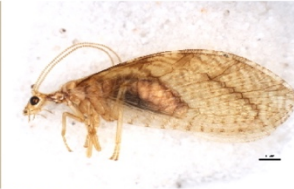

**09BBNEU-0142 [Lateral]**  
*Micromus montanus*  
BIN URI: BOLD:AAM8203

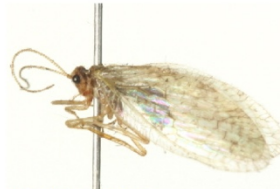

**BIOUG00762-F11 [Lateral]**  
*Micromus borealis*  
BIN URI: BOLD:ACE3855

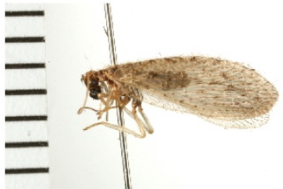

**08BBNEU-013 [Lateral]**  
*Micromus*  
BIN URI: BOLD:AAG0893

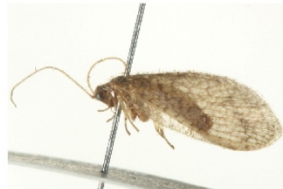

**PHFLO-0106 [Lateral]**  
*Micromus posticus*  
BIN URI: BOLD:AAG0906

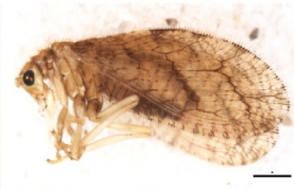

**09BBNEU-0148 [Lateral]**  
*Micromus angulatus*  
BIN URI: BOLD:ACZ1412

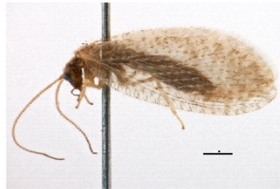

**BIOUG10951-B11 [Lateral]**  
*Hemerobius dorsatus*  
BIN URI: BOLD:ACC8926

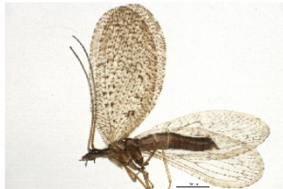

**BIOUG03505-C06 [Lateral]**  
*Hemerobius dorsatus*  
BIN URI: BOLD:AAV4327

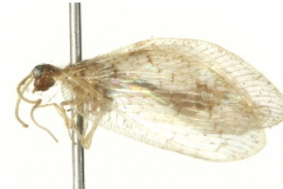

**BIOUG00762-F03 [Lateral]**  
*Hemerobius*  
BIN URI: BOLD:AAP2910

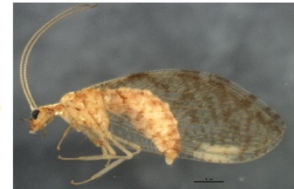

**BIOUG00864-A06 [Lateral]**  
*Hemerobius*  
BIN URI: BOLD:AAV6706

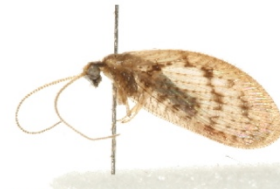

**08BBNEU-088 [Lateral]**  
*Hemerobius ovalis*  
BIN URI: BOLD:AAG0901

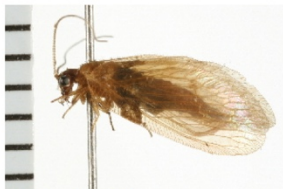

**08BBNEU-063 [Lateral]**  
*Hemerobius conjunctus*  
BIN URI: BOLD:AAG0897

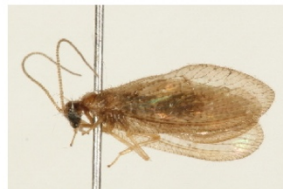

**09BBNEU-0095 [Lateral]**  
*Hemerobius pinidum*  
BIN URI: BOLD:AAG0904

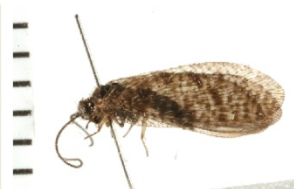

**08BBNEU-052 [Lateral]**  
*Hemerobius*  
BIN URI: BOLD:AAG0896

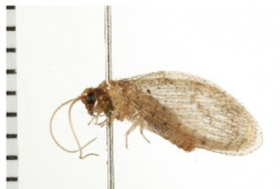

**08BBNEU-005 [Lateral]**  
*Hemerobius humilinus*  
BIN URI: BOLD:AAG0892

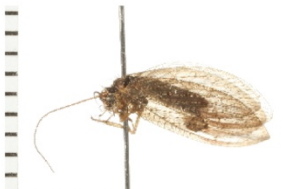

**08BBNEU-018 [Lateral]**  
*Hemerobius*  
BIN URI: BOLD:AAG0891

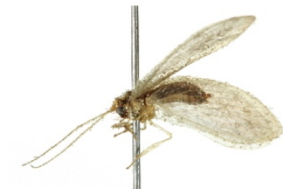

**10BBNEU-0006 [Lateral]**  
*Hemerobius*  
BIN URI: BOLD:AAM7043

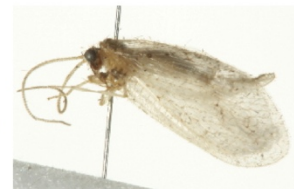

**BIOUG00762-D07 [Lateral]**  
*Hemerobius discretus*  
BIN URI: BOLD:ABZ20149

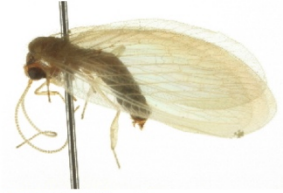

**BIOUG02795-A09 [Lateral]**  
*Hemerobius*  
BIN URI: BOLD:ACZ4269

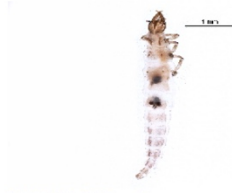

**BIOUG19485-B06 [Larva]**  
*Hemerobius*  
BIN URI: BOLD:ACM1524

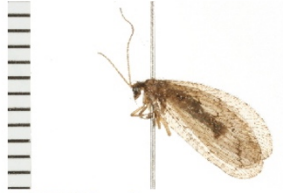

**08BBNEU-021 [Lateral]**  
*Hemerobius ovalis*  
BIN URI: BOLD:AAG0894

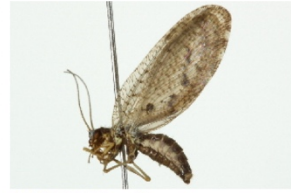

**09BBNEU-0169 [Lateral]**  
*Hemerobius simulans*  
BIN URI: BOLD:ACM1832

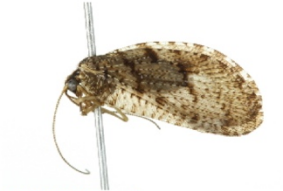

**09BBNEU-0173 [Lateral]**  
*Wesmaelius longifrons*  
BIN URI: BOLD:AAP4512

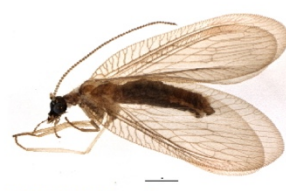

**BIOUG05803-G04 [Lateral]**  
*Wesmaelius brunneus*  
BIN URI: BOLD:ACD5307

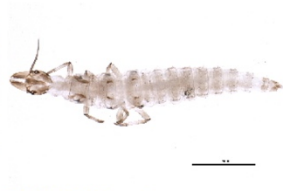

**BIOUG16124-G03 [Larva]**  
*Wesmaelius pretiosus*  
BIN URI: BOLD:ACI5934

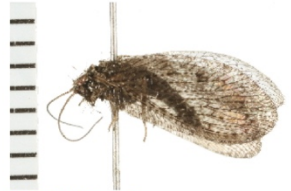

**08BBNEU-066 [Lateral]**  
*Wesmaelius furcatus*  
BIN URI: BOLD:AAG0888

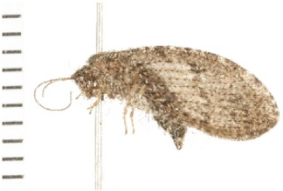

**08BBNEU-071 [Lateral]**  
*Wesmaelius involutus*  
BIN URI: BOLD:AAG0899

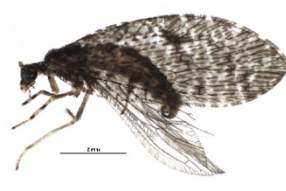

**BIOUG20171-E09 [Lateral]**  
*Wesmaelius*  
BIN URI: BOLD:AAP2909

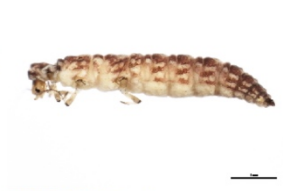

**BIOUG00676-A12 [Lateral]**  
*Wesmaelius nervosus*  
BIN URI: BOLD:AAP2908

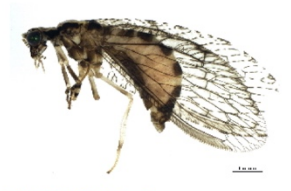

**BIOUG16073-F03 [Lateral]**  
*Wesmaelius*  
BIN URI: BOLD:ACP8517

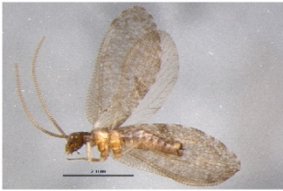

**BIOUG02863-D02 [Lateral]**  
*Sympherobius amicitulus*  
BIN URI: BOLD:ACA8714

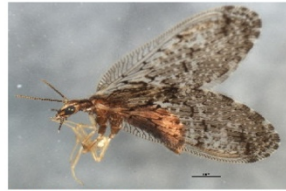

**BIOUG00864-D03 [Lateral]**  
*Sympherobius*  
BIN URI: BOLD:AAV6709

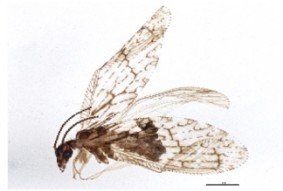

**BIOUG03522-C11 [Lateral]**  
*Sympherobius angustus*  
BIN URI: BOLD:ACE0330

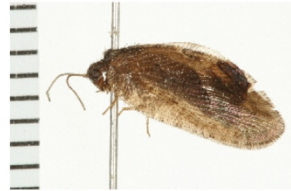

**08BBNEU-050 [Lateral]**  
*Megalonus angulatus*  
BIN URI: BOLD:AAG0885

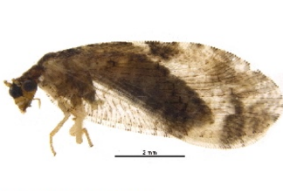

**BIOUG21523-F03 [Lateral]**  
Hemerobidae  
BIN URI: BOLD:ACV4271

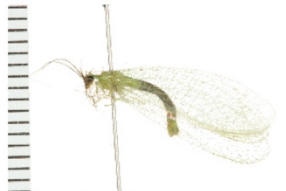

**08BBNEU-057 [Lateral]**  
*Chrysopa nigricomis*  
BIN URI: BOLD:AAG2020

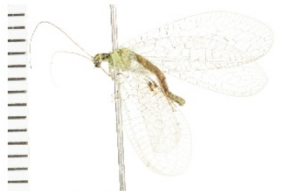

**08BBNEU-053 [Lateral]**  
*Chrysopa chi*  
BIN URI: BOLD:AAG2018

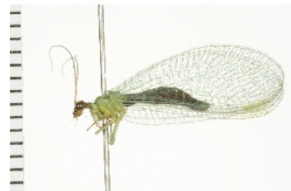

**08BBNEU-033 [Lateral]**  
*Chrysopa oculata*  
BIN URI: BOLD:AAG2017

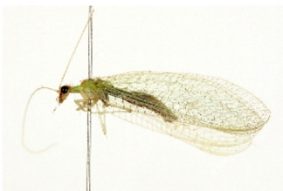

**09BBNEU-0003 [Lateral]**  
*Chrysopa quadripunctata*  
BIN URI: BOLD:AAG2028

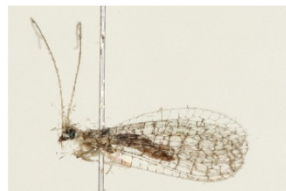

**09BBNEU-0097 [Lateral]**  
*Eremochrysa punctinervis*  
BIN URI: BOLD:AAG0900

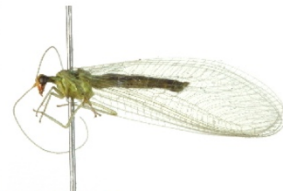

**10BBNEU-0012 [Lateral]**  
*Chrysoperla*  
BIN URI: BOLD:AAB0373

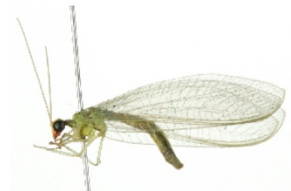

**10BBNEU-0033 [Lateral]**  
*Chrysoperla rufilabris*  
BIN URI: BOLD:AAG2026

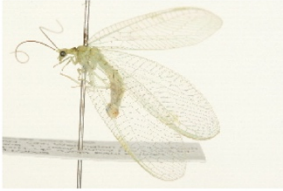

**NEUR 0019.02 [Lateral]**  
*Meleoma signoretii*  
BIN URI: BOLD:AAG2022

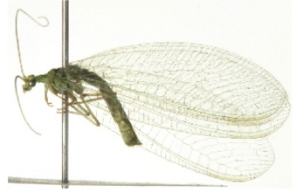

**BIOUG00762-B01 [Lateral]**  
*Meleoma emuncta*  
BIN URI: BOLD:AAG2019

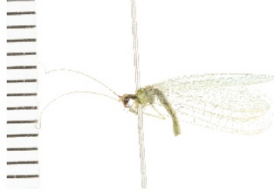

**08BBNEU-073 [Lateral]**  
*Meleoma colichartha*  
BIN URI: BOLD:AAG2021

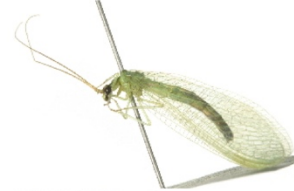

**BIOUG00762-F12 [Lateral]**  
*Chrysoperla plorabunda*  
BIN URI: BOLD:AAF3166

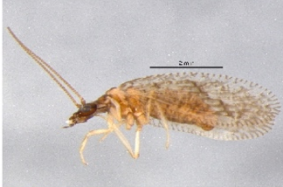

**BIOUG02863-D11 [Lateral]**  
*Pseotra*  
BIN URI: BOLD:ACA8766

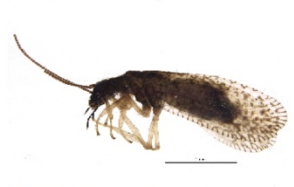

**BIOUG11001-E06 [Lateral]**  
*Pseotra*  
BIN URI: BOLD:ACV1408

**Supplementary File 6.** Taxonomic breakdown for the eight major collection methods used in the 'National Parks' subset. Taxonomic breakdown is summarized for a) specimens and b) BINs captured.

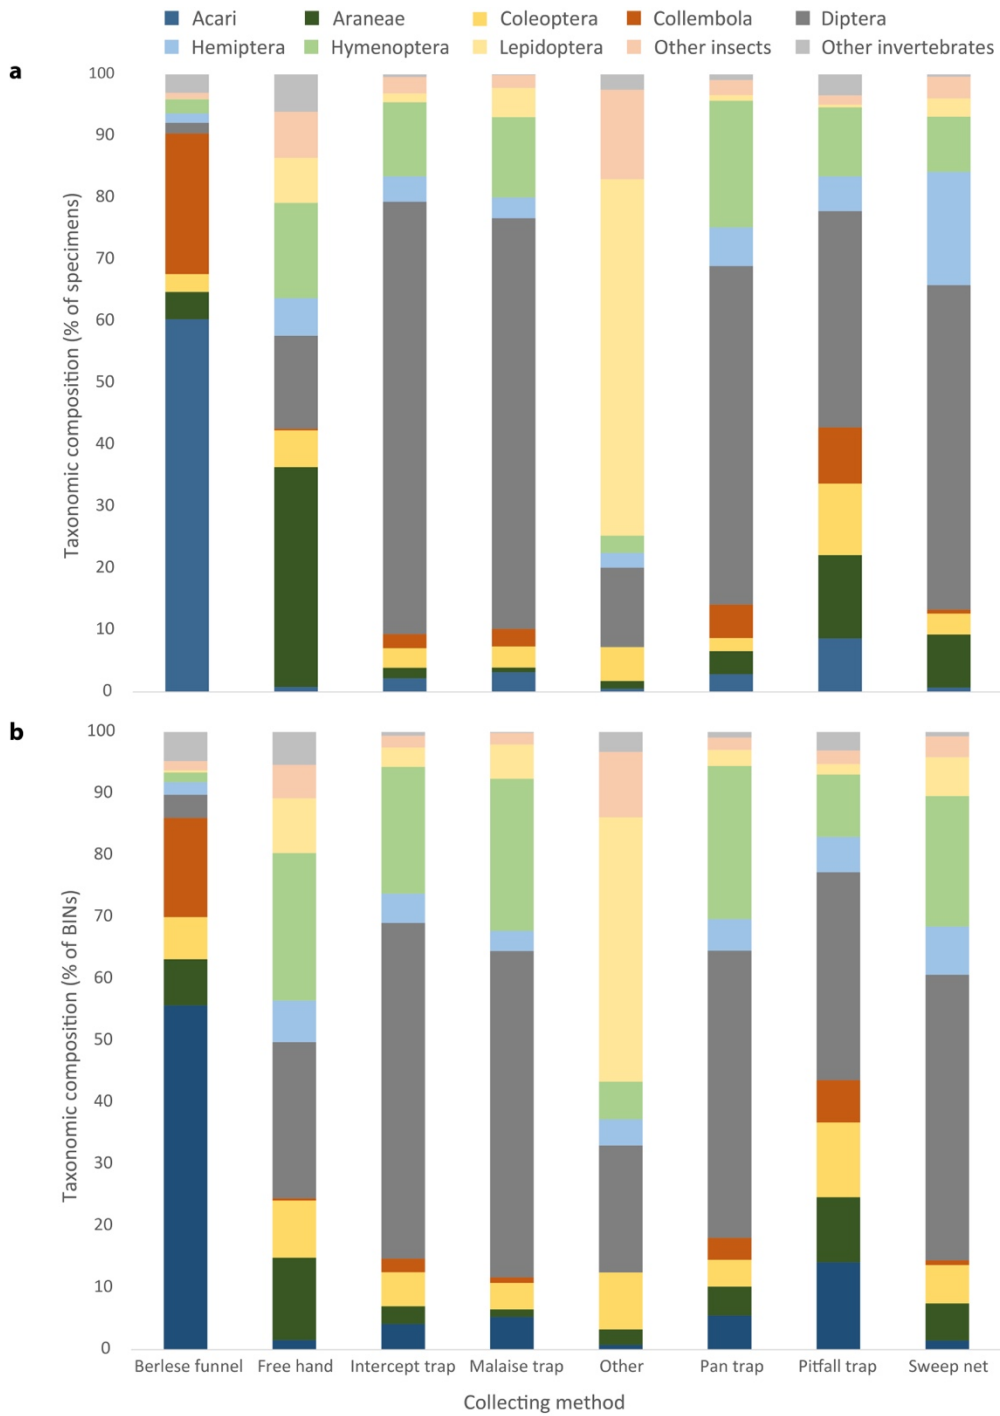

Supplement: MOESM1 [file 41597_2019_320_MOESM1_ESM.pdf]
